# Supplementary material for: Predicting TCR sequences for unseen antigen epitopes using structural and sequence features
Source: PubMed Central journal article supplement — Brief Bioinform. 2024 May 6;25(3):bbae210. doi: 10.1093/bib/bbae210 (PMC11074592; doi:10.1093/bib/bbae210), 2024-05-06
Supplement: supplementary_figures_s1_to_s3_bbae210.pdf [file supplementary_figures_s1_to_s3_bbae210.pdf]

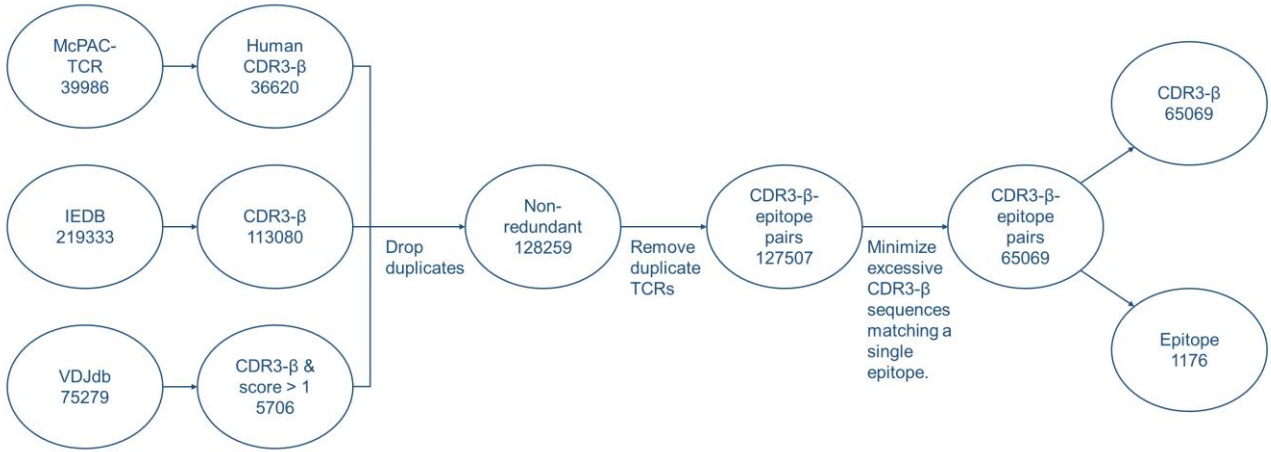

Supplementary Figure 1: Data cleaning process.

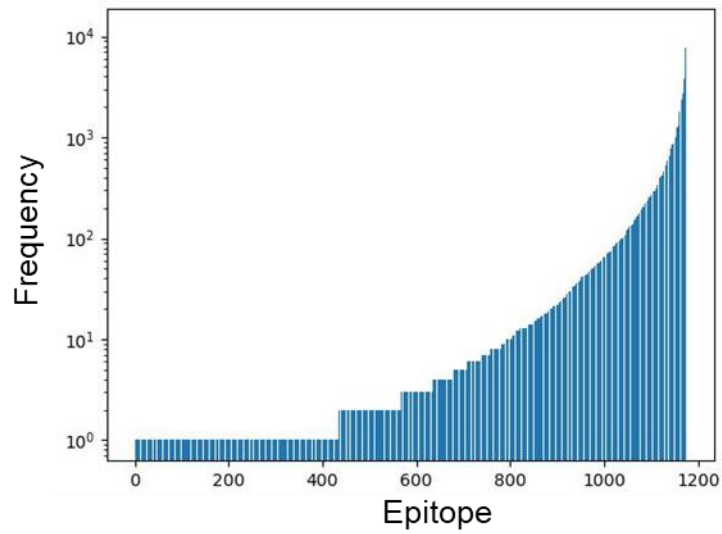

Supplementary Figure 2: Frequencies of CDR3-β corresponding to different epitopes.

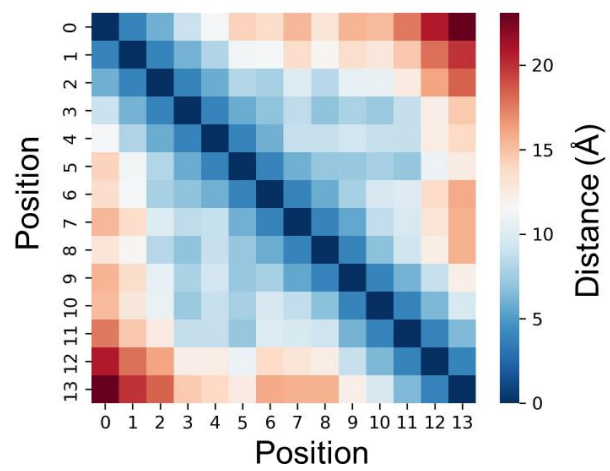

Supplementary Figure 3: An example illustration of residue contacts matrices.
